# Supplementary material for: A one-step and scalable production route to metal nanocatalyst supported polymer nanospheres via flash nanoprecipitation
Source: Royal Society of Chemistry journal article supplement (doi:10.1039/c4ta04036h), 2014-09-22
Supplement: c4ta04036h1.pdf [file c4ta04036h1.pdf]

# A One-step and Scalable Production Route to Metal Nanocatalyst Supported Polymer Nanospheres *via* Flash NanoPrecipitation

Rui Liu,<sup>†</sup> Chris Sosa,<sup>†</sup> Yao-Wen Yeh,<sup>‡</sup> Fengli Qu,<sup>†§</sup> Nan Yao,<sup>‡</sup> Robert K. Prud'homme<sup>†</sup> and Rodney D. Priestley<sup>\*†‡</sup>

<sup>†</sup>Department of Chemical and Biological Engineering, <sup>‡</sup>Princeton Institute for the Science and Technology of Materials, Princeton University, Princeton, NJ, 08544 USA; <sup>§</sup>College of Chemistry and Chemical Engineering, Qufu Normal University, Qufu, 273165, China

Corresponding Author: [rpriestl@princeton.edu](mailto:rpriestl@princeton.edu)

## Experimental Section

**FNP of metal@PS-*b*-PVP(denoted **P1**):** a syringe containing 1 mL of 3 mg/mL PS<sub>793k</sub>-*b*-PVP<sub>35k</sub> (PDI=1.08, purchased from Polymer Source, Inc.) in THF was placed at the inlet of Stream 1, and a syringe containing 1 mL of 0.45 mg/mL HAuCl<sub>4</sub> in H<sub>2</sub>O was placed at the inlet of Stream 2. Subsequently, fluid was expressed manually from both syringes and merged into a mixing stream. The mixed stream was then diluted into a 10 mL water reservoir containing 1 mg NaBH<sub>4</sub> and 10 mg SDS. Control of composites was realized by changing the feed concentration using the same set-up (Details on the synthesis parameters are listed in Table S1). Pt@PS-*b*-PVP was prepared by replacing Stream 2 with 1 mL of 3 mg/mL H<sub>2</sub>PtCl<sub>6</sub> in H<sub>2</sub>O.

**Catalytic study:** 1 mL of 0.1 mM *p*-nitrophenol was mixed with a freshly prepared aqueous solution of NaBH<sub>4</sub> (2 mL, 0.1M). Au@PS-*b*-PVP(**P1**) (250μg) was then added. UV/Vis absorption spectra were recorded to monitor the change in the reaction mixture after the removal of nanoparticles. After the reduction process was completed, the catalyst was separated from the mixture and dried in a vacuum oven overnight for reuse in the next cycle – this process was repeated 5 times.

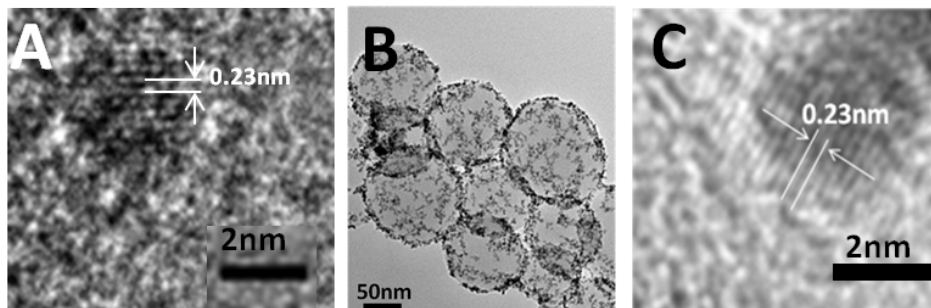

**Figure S1** TEM images of a)Au@PS-*b*-PVP and b,c)Pt@PS-*b*-PVP

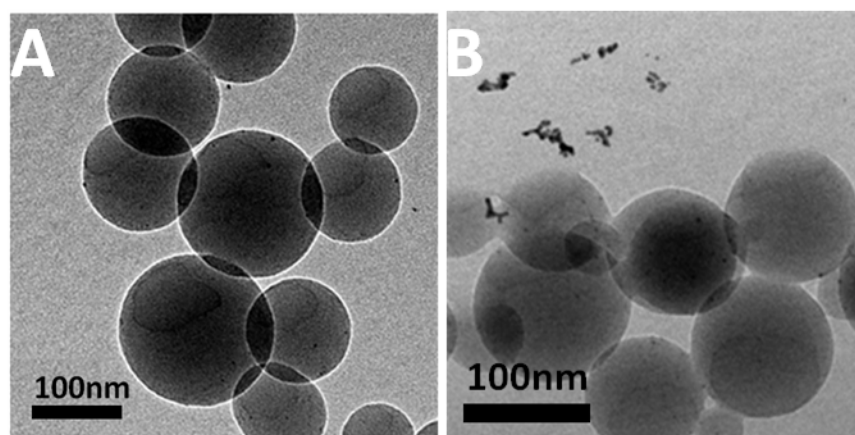

**Figure S2** TEM images of nanoparticles obtained through FNP using PS in THF as Stream 1 (feeding concentration: 3mg/mL PS/THF and 0.45mg/mL HAuCl<sub>4</sub>/H<sub>2</sub>O)

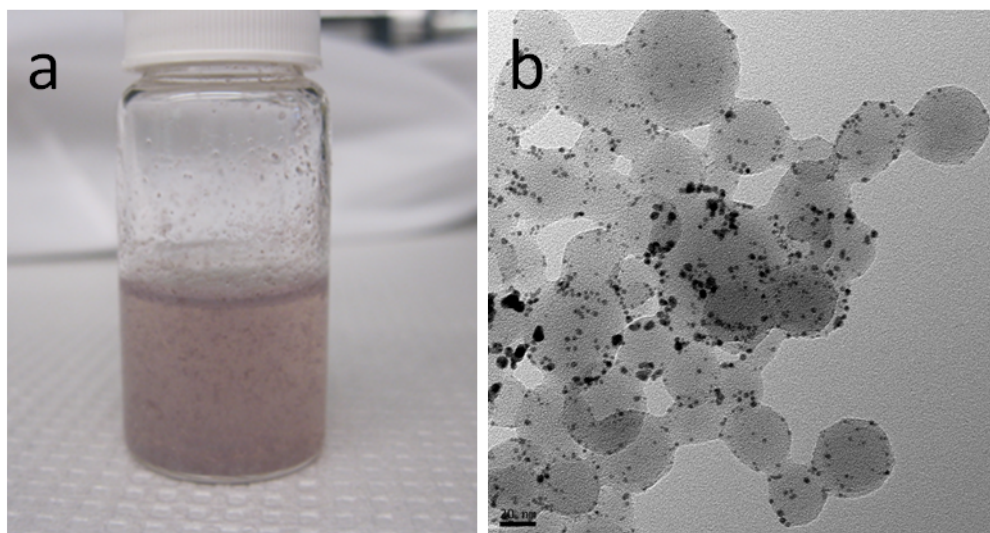

**Figure S3** a) Photograph and b) TEM image illustrating the aggregation of Au@PS-*b*-PVP in the absence of SDS

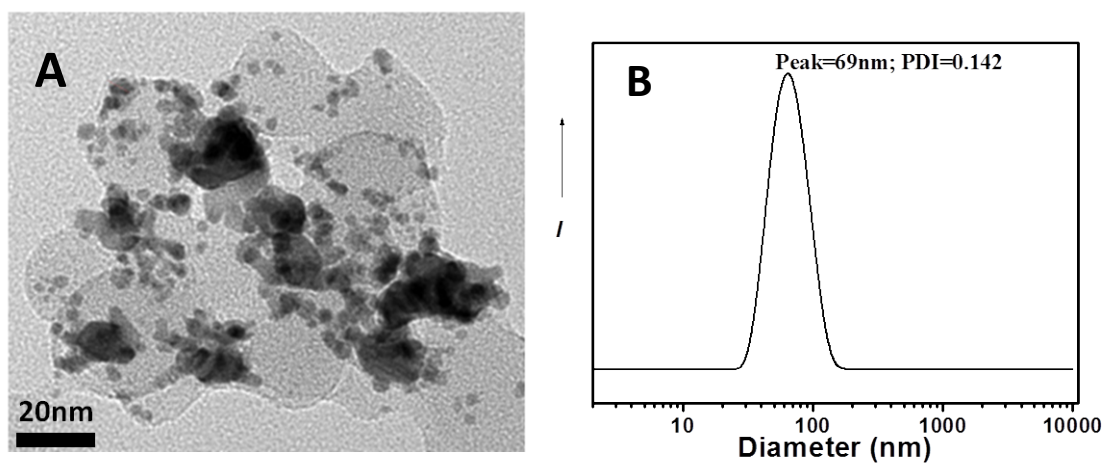

**Figure S4** a) TEM and b) DLS of P5

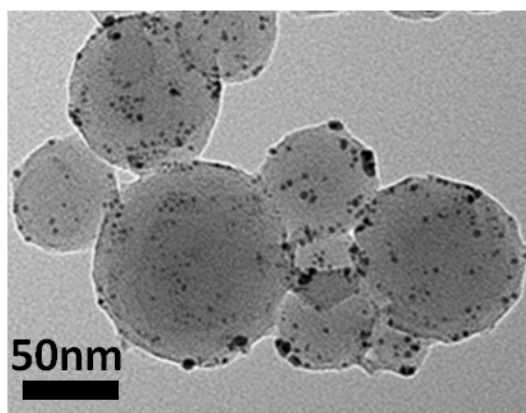

**Figure S5** TEM images of Au@PS-*b*-PVP (**P1**) nanocatalysts after 5 times re-uses

**Table S1** Preparation parameters of Au@PS-*b*-PVP through FNP

|    | Stream 1<br>PS- <i>b</i> -PVP /THF<br>(mg/mL) | Stream 2<br>HAuCl <sub>4</sub> /H <sub>2</sub> O<br>(mg/mL) |
|----|-----------------------------------------------|-------------------------------------------------------------|
| P1 | 3                                             | 0.45                                                        |
| P2 | 3                                             | 0.15                                                        |
| P3 | 3                                             | 0.9                                                         |
| P4 | 6                                             | 0.45                                                        |
| P5 | 1                                             | 0.45                                                        |
| P6 | 1                                             | 0.15                                                        |
